# Supplementary material for: Core-Shell Magnetoactive PHB/Gelatin/Magnetite Composite Electrospun Scaffolds for Biomedical Applications
Source: MDPI journal article supplement (doi:10.3390/polym14030529), 2022-01-28
Supplement: s1 [file s1]

# Supplementary materials

## **Preparation and characterization of core-shell magnetoactive PHB/gelatin/magnetite composite electrospun scaffolds for biomedical applications**

Artyom S. Pryadko<sup>1</sup>, Vladimir V. Botvin<sup>2</sup>, Yulia R. Mukhortova<sup>1,2</sup>, Igor Pariy<sup>1</sup>, Dmitriy V. Wagner<sup>3</sup>, Pavel P. Laktionov<sup>4</sup>, Boris P. Chelobanov<sup>4,5</sup>, Roman V. Chernozem<sup>1,2</sup>, Maria A. Surmeneva<sup>1,2</sup>, A.L. Kholkin<sup>1,2,6</sup>, and Roman A. Surmenev<sup>1,2\*</sup>

<sup>1</sup> Physical materials science and composite materials center, Research School of Chemistry & Applied Biomedical Sciences, National Research Tomsk Polytechnic University, 634050, Tomsk, Russia

<sup>2</sup> International Research & Development Center "Piezo- and magnetoelectric materials", Research School of Chemistry & Applied Biomedical Sciences, National Research Tomsk Polytechnic University, 634050 Tomsk, Russia

<sup>3</sup> National Research Tomsk State University, 634050, Tomsk, Russia

<sup>4</sup> Institute of Chemical Biology and Fundamental Medicine, Siberian Branch, Russian Academy of Sciences, 630090 Novosibirsk, Russia

<sup>5</sup> Novosibirsk State University, 630090 Novosibirsk, Russia

<sup>6</sup> Department of Physics & CICECO - Aveiro Institute of Materials, University of Aveiro, Aveiro, Portugal

\*corresponding authors: [rsurmenev@mail.ru](mailto:rsurmenev@mail.ru) (R.A. Surmenev); [kholkin@ua.pt](mailto:kholkin@ua.pt) (A.L. Kholkin)

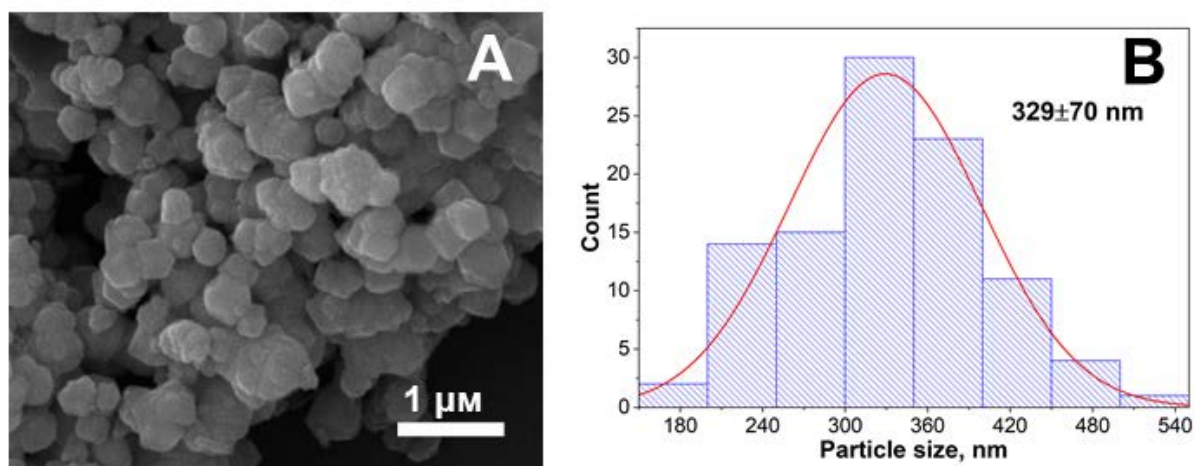

**Figure S1.** SEM image (A) and particle size distribution (B) of Fe<sub>3</sub>O<sub>4</sub>

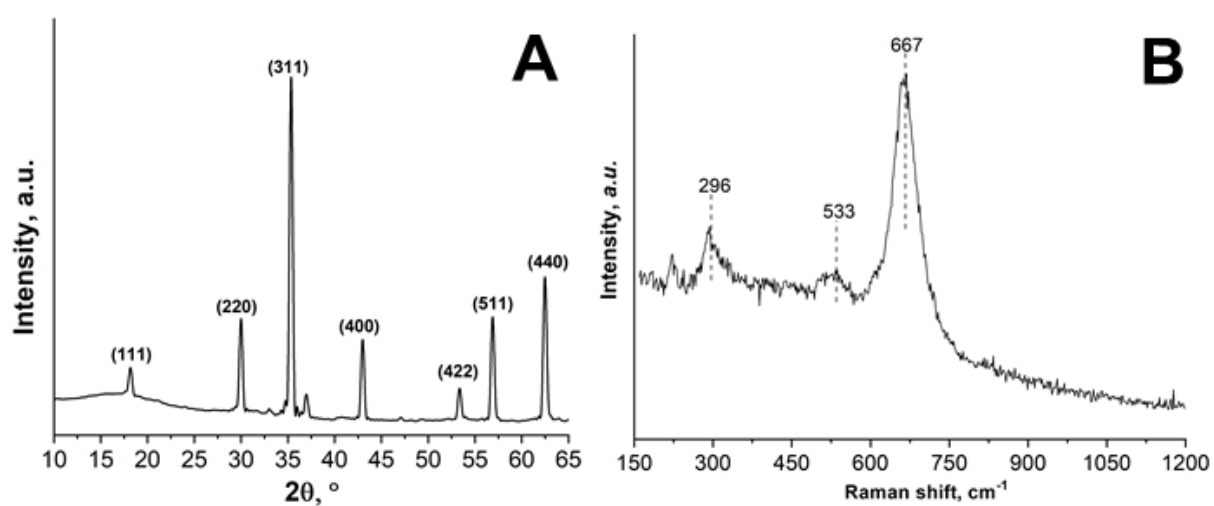

**Figure S2.** XRD patterns (A) and Raman spectrum (B) of Fe<sub>3</sub>O<sub>4</sub>

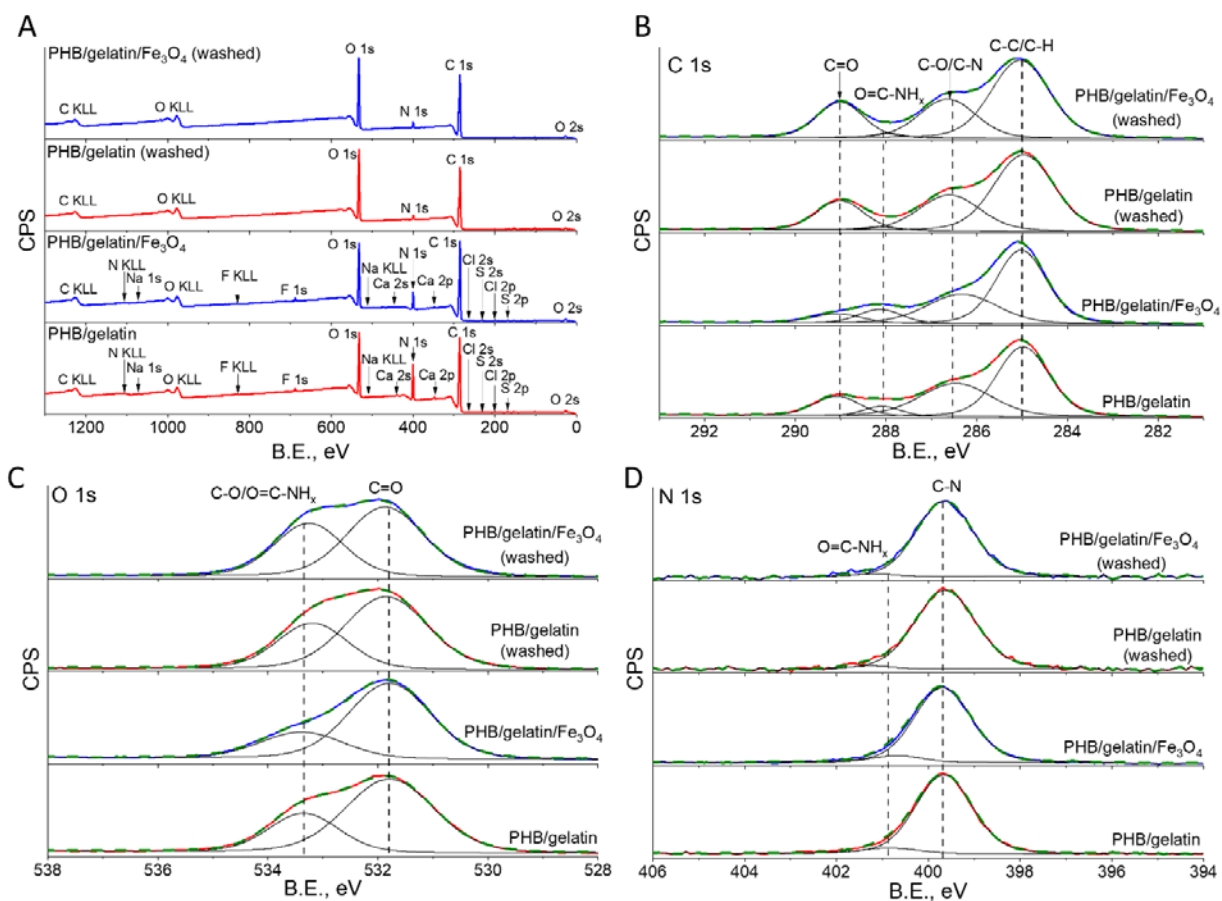

**Figure S3.** (A) Survey and high-resolution XPS spectra of the (B) C1s, (C) O 1s and (D) N 1s regions for as-electrospun scaffolds and scaffolds after immersion in saline solution for 3 h
